# Supplementary material
Source: Springer Nature journal article supplement (https://www.springermedizin.de/resource/supplementary/12913_2011_2021_MOESM2_ESM.pdf/9529596)

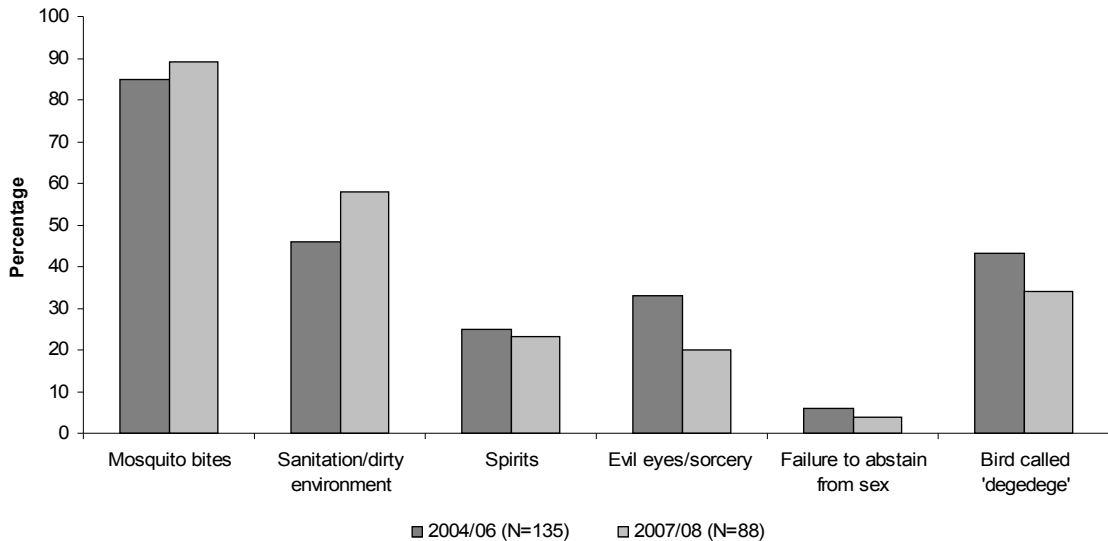

Note: Multiple answers were possible.

Supplement: MOESM2 [file 9529596]
